# Supplementary material
Source: Research Square preprint supplement (doi:10.21203/rs.3.rs-14065/v2)
Supplement: Supplementary file 1 [file 072c21e0a2c1a2132c37d311.docx]

|  | 1998-2002 | | 2003-2007 | | 2008-2012 | | 2013-2017 | |
| --- | --- | --- | --- | --- | --- | --- | --- | --- |
|  | n | R (%) | n | R (%) | n | R (%) | n | R (%) |
| **FLUOROQUINOLONES** |  |  |  |  |  |  |  |  |
| Levofloxacin (5ug) | 16 | 6.2 | 191 | 1 | 266 | 1.9 | 520 | 4.2 |
| **FOLATE PATHWAY ANTAGONISTS** |  |  |  |  |  |  |  |  |
| trimethoprim/sulfamethoxazole (1.25/23.75ug) | 38 | 10.5 | 243 | 9.5 | 268 | 22.4 | 531 | 11.1 |
| **CEPHEMS** |  |  |  |  |  |  |  |  |
| Ceftazidime (30ug) | 41 | 0 | 171 | 0 | 102 | 0 | 365 | 58.1 |
| **PHENICOLS** |  |  |  |  |  |  |  |  |
| Chloramphenicol (30ug) | 24 | 0 | 90 | 0 | 19 | 0 | 259 | 5 |

Table S6. Resistance of *Stenotrophomonas maltophilia* from BSI to commonly used antibiotics
