# Supplementary material
Source: Research Square preprint supplement (doi:10.21203/rs.3.rs-14065/v2)
Supplement: Supplementary file 2 [file df6e5ee6eefe48c7b067d61e.docx]

| Table S5. Resistance of *Acinetobacter baumannii* from BSI to commonly used antibiotics | | | | | | | | |
| --- | --- | --- | --- | --- | --- | --- | --- | --- |
|  | 1998-2002 | | 2003-2007 | | 2008-2012 | | 2013-2017 | |
|  | n | R（%） | n | R（%） | n | R（%） | n | R（%） |
| **PENICILLINS** |  |  |  |  |  |  |  |  |
| Piperacillin (100ug) | 9 | 22.2 | 64 | 50 | 341 | 69.5 | 760 | 78.8 |
| **β-LACTAM COMBINATION AGENTS** |  |  |  |  |  |  |  |  |
| Cefoperazone sulbactam (75/75ug) | / | / | 62 | 12.9 | 299 | 24.4 | 643 | 63.1 |
| Piperacillin Tazobactam (100/10ug) | / | / | 36 | 41.7 | 245 | 62 | 876 | 74.9 |
| **CEPHEMS** |  |  |  |  |  |  |  |  |
| Ceftazidime (30ug) | 10 | 30 | 68 | 42.6 | 351 | 63 | 879 | 76.5 |
| Cefepime (30ug) | / | / | 65 | 38.5 | 310 | 62.9 | 986 | 75.4 |
| **CARBAPENEMS** |  |  |  |  |  |  |  |  |
| Imipenem (10ug) | / | / | 68 | 23.5 | 334 | 61.1 | 989 | 74.4 |
| Meropenem (10ug) | / | / | 30 | 20 | 272 | 58.1 | 829 | 76.1 |
| **AMINOGLYCOSIDES** |  |  |  |  |  |  |  |  |
| Amikacin (30ug) | 10 | 20 | 64 | 39.1 | 351 | 59.8 | 916 | 67.7 |
| Gentamicin (10ug) | 10 | 40 | 65 | 49.2 | 344 | 67.4 | 986 | 75.5 |
| **FLUOROQUINOLONES** |  |  |  |  |  |  |  |  |
| Ciprofloxacin (5ug) | 10 | 40 | 63 | 31.7 | 317 | 57.7 | 969 | 74.5 |
| Levofloxacin (5ug) | / | / | 46 | 28.3 | 273 | 57.9 | 928 | 69.6 |
| **FOLATE PATHWAY ANTAGONISTS** |  |  |  |  |  |  |  |  |
| trimethoprim/sulfamethoxazole (1.25/23.75ug) | 8 | 25 | 68 | 50 | 268 | 63.4 | 962 | 74.3 |

Footnote: “/” indicated that the antibiotics had not been tested.
